# Supplementary material for: Enhancement of SARS-CoV-2 N Antigen-Specific T Cell Functionality by Modulating the Autophagy-Mediated Signal Pathway in Mice
Source: MDPI journal article supplement (doi:10.3390/v15061316), 2023-06-02
Supplement: s1 [file s1]

*Supplementary Material*

**Supplementary Tables**

Table S1. Primer Sequences

| Primer        | Sequence                                                    |
|---------------|-------------------------------------------------------------|
| Hind3-N-F1    | CCCAAGCTTACCATGTCTGACAATGGC                                 |
| Nlap-F2       | TCTGCTGACTCCACCCAGGCCGGTGGTGGTTCAGGAGGAGGAATGCCGTCCGAGAAGAC |
| N-lap-R2      | GAAGGTCTTCTCGGACGGCATTCTCTCTCTGAACCACCACCGGCCTGGGTGGAGTCAG  |
| Xba1-flagN-R2 | GCTCTAGATTACTTGTCATCATCATCCTTGCTAGTCCACAGCCATTGCTGTCCCG     |
